# Supplementary material for: Decoded Antarctic snow accumulation history reconciles observed and modeled trends in accumulation and large-scale warming patterns
Source: Copernicus journal article supplement (doi:10.5194/egusphere-2025-3666), 2025-09-16

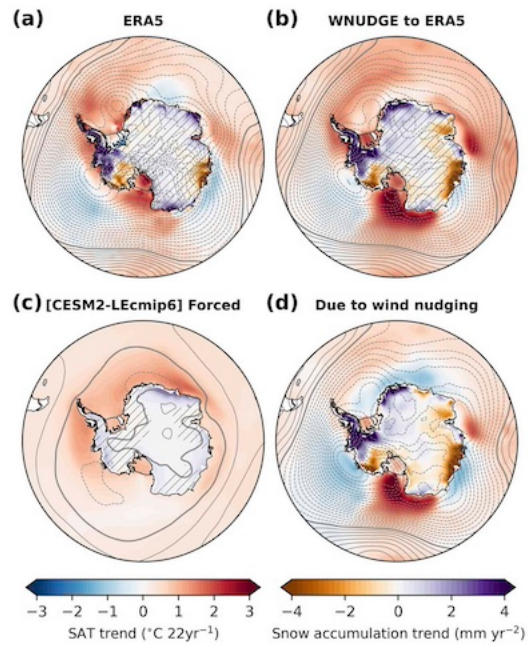

Supplement: Supplementary file [file egusphere-2025-3666-AC1-supplement.pdf]
